# Supplementary material for: Systemic infusion of TLR3-ligand and IFN-α in patients with breast cancer reprograms local tumor microenvironments for selective CTL influx
Source: PubMed Central journal article supplement — J Immunother Cancer. 2023 Nov 14;11(11):e007381. doi: 10.1136/jitc-2023-007381 (PMC10649898; doi:10.1136/jitc-2023-007381), 2023-11-14

**Supplemental Table 1.** Transcription levels of CD8 $\alpha$ , granzyme B (GZMB), FoxP3, PD-L1, CTL- and Treg-attracting chemokines, as well as ratios of CD8 $\alpha$ /FoxP3, GZMB/FoxP3, CCL5/CCL22 and CXCL10/CCL22 (N=6 patients) were measured using RT-PCR (TaqMan). All gene expression levels were normalized for HPRT1 housekeeping gene in each sample.

| Gene Expression Normalized for HPRT1 |         |          |          |          |        |          |          |          |          |          |          |          |          |          |          |          |          |          |
|--------------------------------------|---------|----------|----------|----------|--------|----------|----------|----------|----------|----------|----------|----------|----------|----------|----------|----------|----------|----------|
| Gene:                                | CD8a    |          | GZMB     |          | FOXP3  |          | PD-L1    |          | CCL5     |          | CXCL9    |          | CXCL10   |          | CCL22    |          | CXCL12   |          |
|                                      | Pre     | Post     | Pre      | Post     | Pre    | Post     | Pre      | Post     | Pre      | Post     | Pre      | Post     | Pre      | Post     | Pre      | Post     | Pre      | Post     |
| PT3                                  | 0.157   | 0.341667 | 0.015333 | 0.038667 | 0.0337 | 0.037    | 0.036266 | 0.045793 | 0.24     | 0.493667 | 1.135667 | 1.999667 | 0.105667 | 0.349667 | 0.002    | 0.003667 | 0.087667 | 0.054667 |
| PT4                                  | 0.006   | 0.091333 | *        | 0        | 0.003  | 0.001    | 0.001667 | 0.002333 | 0.004667 | 0.027667 | 0.006    | 0.014333 | 0.010667 | 0.013667 | 0.001333 | 0.005667 | 0.131    | 0.406    |
| PT5                                  | 0.03867 | 0.274    | 0.012    | 0.169667 | 0.0593 | 0.008667 | 0.006667 | 0.006667 | 0.078667 | 0.239333 | 0.033667 | 0.011333 | 0.051    | 0.707667 | 0.012667 | 0.0003   | 0.644667 | 0.494333 |
| PT6                                  | 0.06467 | 2.081667 | 0.024333 | 0.179333 | 4.2623 | 0.066    | 0.005    | 0.002333 | 0.353333 | 2.262667 | 3.013667 | 1.817333 | 0.441    | 1.663667 | 1.078    | 0.298    | 0.144667 | 0.034667 |
| PT7                                  | 0.144   | 0.573667 | 0.028    | 0.119    | 0.0217 | 0.044    | 1.68E-05 | 0        | 0.466    | 2.968333 | 0.643    | 3.920333 | 0.595333 | 1.285333 | 0.006667 | 0.006667 | 0.783    | 0.586333 |
| PT8                                  | 0.159   | 0.104    | 0.084333 | 0.060333 | 0.0393 | 0.012667 | 0.003259 | 0.002404 | 0.881667 | 0.682333 | 1.681667 | 0.762    | 0.409    | 0.201    | 0.023667 | 0.004333 | 1.078    | 0.298    |

  

| Ratios |           |          |            |          |            |          |              |          |
|--------|-----------|----------|------------|----------|------------|----------|--------------|----------|
| Genes: | CD8/FOXP3 |          | GZMB/FOXP3 |          | CCL5/CCL22 |          | CXCL10/CCL22 |          |
|        | Pre       | Post     | Pre        | Post     | Pre        | Post     | Pre          | Post     |
| PT3    | 4.663366  | 9.234235 | 0.455445   | 1.045045 | 120        | 134.6351 | 52.83335     | 95.36277 |
| PT4    | 6         | 91.3333  | 0.4        | 3        | 3.500026   | 4.882325 | 8.000027     | 2.411751 |
| PT5    | 0.651691  | 31.61526 | 0.202247   | 19.57685 | 6.210529   | 797.7778 | 4.026316     | 2358.889 |
| PT6    | 0.015172  | 31.5404  | 0.005709   | 2.717172 | 0.327767   | 7.592841 | 0.409091     | 5.582774 |
| PT7    | 6.646144  | 13.03788 | 1.292306   | 2.704545 | 69.9       | 445.2478 | 89.29999     | 192.799  |
| PT8    | 4.042373  | 8.210524 | 2.144067   | 4.763156 | 37.25352   | 157.4627 | 17.28169     | 46.38497 |

\* Since the readout was under the limit of detection, 0.0004 was used for estimating a fold-change.

## Supplemental Table 2. Adverse events, definitely, probably or possibly related to CKM, as determined by CTCAEv5.0.

| Adverse events definitely, probably, or possibly related to CKM                                                                                                   | Grade 1<br>N (%) | Grade 2<br>N (%) | Grade 3<br>N (%) | Grade 4<br>N (%) | Grade 5<br>N (%) |
|-------------------------------------------------------------------------------------------------------------------------------------------------------------------|------------------|------------------|------------------|------------------|------------------|
| <b>Hematologic</b>                                                                                                                                                |                  |                  |                  |                  |                  |
| ITP                                                                                                                                                               | 0 (0.0)          | 0 (0.0)          | 1 (12.5)         | 0 (0.0)          | 0 (0.0)          |
| <b>Gastrointestinal</b>                                                                                                                                           |                  |                  |                  |                  |                  |
| Mouth bleeding                                                                                                                                                    | 0 (0.0)          | 1 (12.5)         | 0 (0.0)          | 0 (0.0)          | 0 (0.0)          |
| Nausea                                                                                                                                                            | 1 (12.5)         | 3 (37.5)         | 0 (0.0)          | 0 (0.0)          | 0 (0.0)          |
| Vomiting                                                                                                                                                          | 1 (12.5)         | 1 (12.5)         | 0 (0.0)          | 0 (0.0)          | 0 (0.0)          |
| <b>General</b>                                                                                                                                                    |                  |                  |                  |                  |                  |
| Chills                                                                                                                                                            | 6 (75.0)         | 0 (0.0)          | 0 (0.0)          | 0 (0.0)          | 0 (0.0)          |
| Fatigue                                                                                                                                                           | 2 (25.0)         | 2 (25.0)         | 1 (12.5)         | 0 (0.0)          | 0 (0.0)          |
| Malaise                                                                                                                                                           | 0 (0.0)          | 0 (0.0)          | 1 (12.5)         | 0 (0.0)          | 0 (0.0)          |
| Pain                                                                                                                                                              | 1 (12.5)         | 0 (0.0)          | 0 (0.0)          | 0 (0.0)          | 0 (0.0)          |
| Pyrexia                                                                                                                                                           | 1 (12.5)         | 0 (0.0)          | 0 (0.0)          | 0 (0.0)          | 0 (0.0)          |
| <b>Laboratory</b>                                                                                                                                                 |                  |                  |                  |                  |                  |
| ALT increase                                                                                                                                                      | 3 (37.5)         | 0 (0.0)          | 0 (0.0)          | 0 (0.0)          | 0 (0.0)          |
| AST increase                                                                                                                                                      | 3 (37.5)         | 0 (0.0)          | 0 (0.0)          | 0 (0.0)          | 0 (0.0)          |
| ALP increase                                                                                                                                                      | 0 (0.0)          | 1 (12.5)         | 0 (0.0)          | 0 (0.0)          | 0 (0.0)          |
| Lymphocyte count decrease                                                                                                                                         | 0 (0.0)          | 1 (12.5)         | 0 (0.0)          | 0 (0.0)          | 0 (0.0)          |
| Neutrophil count decrease                                                                                                                                         | 0 (0.0)          | 0 (0.0)          | 1 (12.5)         | 0 (0.0)          | 0 (0.0)          |
| Platelet count decrease                                                                                                                                           | 0 (0.0)          | 0 (0.0)          | 0 (0.0)          | 1 (12.5)         | 0 (0.0)          |
| WBC count decrease                                                                                                                                                | 0 (0.0)          | 1 (12.5)         | 0 (0.0)          | 0 (0.0)          | 0 (0.0)          |
| <b>Metabolism and Nutrition</b>                                                                                                                                   |                  |                  |                  |                  |                  |
| Decreased appetite                                                                                                                                                | 0 (0.0)          | 1 (12.5)         | 0 (0.0)          | 0 (0.0)          | 0 (0.0)          |
| <b>Neurological</b>                                                                                                                                               |                  |                  |                  |                  |                  |
| Dizziness                                                                                                                                                         | 1 (12.5)         | 0 (0.0)          | 0 (0.0)          | 0 (0.0)          | 0 (0.0)          |
| Headache                                                                                                                                                          | 1 (12.5)         | 0 (0.0)          | 0 (0.0)          | 0 (0.0)          | 0 (0.0)          |
| Taste disorder                                                                                                                                                    | 0 (0.0)          | 1 (12.5)         | 0 (0.0)          | 0 (0.0)          | 0 (0.0)          |
| <b>Cutaneous</b>                                                                                                                                                  |                  |                  |                  |                  |                  |
| Night sweats                                                                                                                                                      | 1 (12.5)         | 0 (0.0)          | 0 (0.0)          | 0 (0.0)          | 0 (0.0)          |
| Petechiae                                                                                                                                                         | 0 (0.0)          | 1 (12.5)         | 0 (0.0)          | 0 (0.0)          | 0 (0.0)          |
| Rash                                                                                                                                                              | 1 (12.5)         | 0 (0.0)          | 0 (0.0)          | 0 (0.0)          | 0 (0.0)          |
| <b>Vascular</b>                                                                                                                                                   |                  |                  |                  |                  |                  |
| Hot flashes                                                                                                                                                       | 3 (37.5)         | 0 (0.0)          | 0 (0.0)          | 0 (0.0)          | 0 (0.0)          |
| Hypotension                                                                                                                                                       | 1 (12.5)         | 0 (0.0)          | 0 (0.0)          | 0 (0.0)          | 0 (0.0)          |
| Abbreviations: ALP- alkaline phosphatase; ALT- alanine aminotransferase; AST- aspartate transaminase; ITP- immune thrombocytopenic purpura; WBC- white blood cell |                  |                  |                  |                  |                  |

### Supplemental Table 3. Adverse events, definitely, probably, or possibly related to pembrolizumab as determined by CTCAEv5.0

| Adverse events definitely, probably, or possible related to pembrolizumab     | Grade 1<br>N (%) | Grade 2<br>N (%) | Grade 3<br>N (%) | Grade 4<br>N (%) | Grade 5<br>N (%) |
|-------------------------------------------------------------------------------|------------------|------------------|------------------|------------------|------------------|
| <b>Hematologic</b>                                                            |                  |                  |                  |                  |                  |
| ITP                                                                           | 0 (0.0)          | 0 (0.0)          | 1 (12.5)         | 0 (0.0)          | 0 (0.0)          |
| <b>Ophthalmic</b>                                                             |                  |                  |                  |                  |                  |
| Eye disorder                                                                  | 1 (12.5)         | 0 (0.0)          | 0 (0.0)          | 0 (0.0)          | 0 (0.0)          |
| <b>Gastrointestinal</b>                                                       |                  |                  |                  |                  |                  |
| Mouth bleeding                                                                | 0 (0.0)          | 1 (12.5)         | 0 (0.0)          | 0 (0.0)          | 0 (0.0)          |
| <b>General</b>                                                                |                  |                  |                  |                  |                  |
| Fatigue                                                                       | 0 (0.0)          | 2 (25.0)         | 0 (0.0)          | 0 (0.0)          | 0 (0.0)          |
| <b>Laboratory</b>                                                             |                  |                  |                  |                  |                  |
| ALP increase                                                                  | 0 (0.0)          | 1 (12.5)         | 0 (0.0)          | 0 (0.0)          | 0 (0.0)          |
| Lymphocyte count decrease                                                     | 0 (0.0)          | 1 (12.5)         | 0 (0.0)          | 0 (0.0)          | 0 (0.0)          |
| Platelet count decrease                                                       | 0 (0.0)          | 0 (0.0)          | 0 (0.0)          | 1 (12.5)         | 0 (0.0)          |
| <b>Metabolism and Nutrition</b>                                               |                  |                  |                  |                  |                  |
| Myalgia                                                                       | 1 (12.5)         | 0 (0.0)          | 0 (0.0)          | 0 (0.0)          | 0 (0.0)          |
| <b>Respiratory</b>                                                            |                  |                  |                  |                  |                  |
| Dyspnea                                                                       | 0 (0.0)          | 0 (0.0)          | 1 (12.5)         | 0 (0.0)          | 0 (0.0)          |
| Hypoxia                                                                       | 0 (0.0)          | 0 (0.0)          | 1 (12.5)         | 0 (0.0)          | 0 (0.0)          |
| Pneumonitis                                                                   | 0 (0.0)          | 0 (0.0)          | 1 (12.5)         | 0 (0.0)          | 0 (0.0)          |
| <b>Cutaneous</b>                                                              |                  |                  |                  |                  |                  |
| Petechiae                                                                     | 1 (12.5)         | 1 (12.5)         | 0 (0.0)          | 0 (0.0)          | 0 (0.0)          |
| Pruritis                                                                      | 2 (25.0)         | 0 (0.0)          | 0 (0.0)          | 0 (0.0)          | 0 (0.0)          |
| Rash                                                                          | 1 (12.5)         | 0 (0.0)          | 0 (0.0)          | 0 (0.0)          | 0 (0.0)          |
| Abbreviation: ALP- alkaline phosphatase, ITP- immune thrombocytopenic purpura |                  |                  |                  |                  |                  |

**Supplemental Table 4.** Demographic and clinical characteristics and treatment response of patients on the study. A total of 8 patients were enrolled on this study with two patients (PT2 and PT3) receiving prior treatments in the metastatic setting. Four patients were alive at the data cut-off of January 24, 2023. Best response assessments by RECISTv1.1 and irRECIST were concordant for all patients.

| PT | Age at Dx | Race | PD-L1 (%) | Sites of metastasis at treatment initiation | Prior lines of systemic treatment for metastatic disease | Pre- & Post-CKM tissue analyzed | BR (RECIST v1.1) | Time to BR (days) | BR (irRECIST) | Response Duration (days) | Status |
|----|-----------|------|-----------|---------------------------------------------|----------------------------------------------------------|---------------------------------|------------------|-------------------|---------------|--------------------------|--------|
| 1  | 74        | C    | 10        | chest wall, lungs, pleura                   | 0                                                        | No                              | PD*              | 119               | irPD          |                          | A      |
| 2  | 42        | C    | 0         | LN, muscle, pleura, skin                    | 4                                                        | No                              | PD               | 45                | irPD          |                          | D      |
| 3  | 33        | AA   | 10        | bone, LN, s/c tissue                        | 1                                                        | Yes                             | SD               | 50 <sup>#</sup>   | irSD          | 69                       | D      |
| 4  | 66        | C    | 0         | breast, liver                               | 0                                                        | Yes                             | PD               | 56                | irPD          |                          | D      |
| 5  | 38        | C    | 0         | LN, liver, lung, peritoneum                 | 0                                                        | Yes                             | PD               | 42                | irPD          |                          | D      |
| 6  | 69        | C    | 5         | LN                                          | 0                                                        | Yes                             | SD               | 60                | irSD          | 105                      | A      |
| 7  | 63        | C    | 10        | LN, s/c tissue                              | 0                                                        | Yes                             | SD               | 58                | irSD          | 68                       | A      |
| 8  | 36        | C    | 1         | bone, liver, lung, LN, s/c tissue           | 0                                                        | Yes                             | PD               | 51                | irPD          |                          | A      |

\* PT1 continued to have PR after PD per RECIST v1.1 and continues pembrolizumab until the data cut-off date.  
<sup>#</sup> Unscheduled scan performed after 50 days for thrombocytopenia and shortness of breath showed evidence of response

Abbreviations: A- alive; AA- African American; BR- best response; C- Caucasian; CKM- chemokine modulation; D- dead; Dx- diagnosis; LN- lymph node; PD- progressive disease; PR- partial response; s/c- subcutaneous

**Supplemental Figure 1.** PD-L1 expression levels in pre- and post-CKM treatment tumor biopsies were measured using RT-PCR (N=6 patients). Data show in-patient fold increases (post- versus pre-treatment; relative to HPRT1) for PD-L1 gene transcripts.

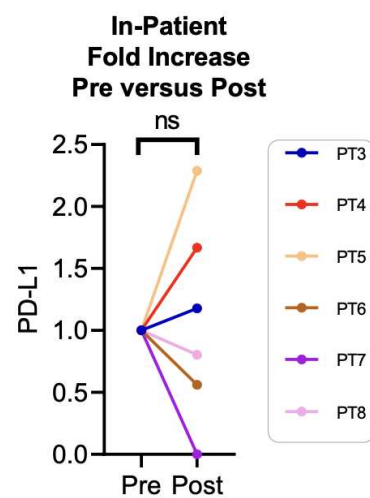

**Supplemental Figure 2.** Transcription levels of CD8 $\alpha$  (N=3 patients) in paired peritumoral biopsies obtained pre- and post-CKM treatment were evaluated by RT-PCR and expressed as (A) in-patient fold increases (post- versus pre-treatment; relative to HPRT1) and (B) raw values (relative to HPRT1).

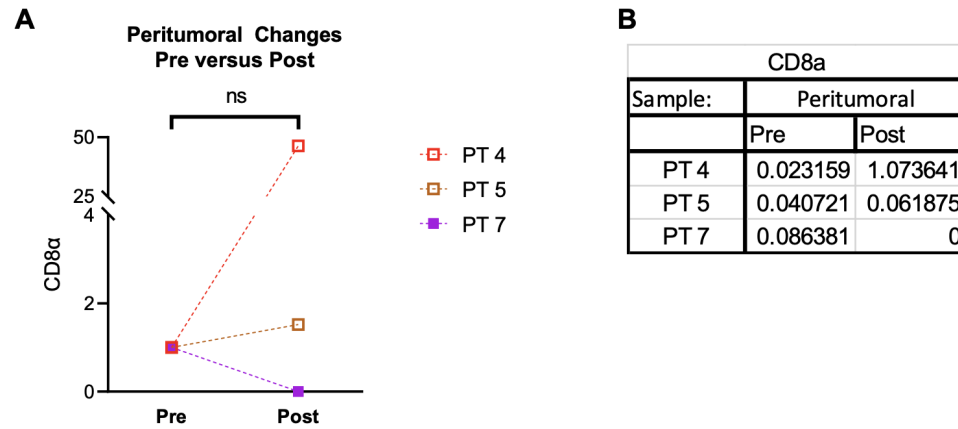

**Supplemental Figure 3.** Changes in the immune cell subsets circulating in the peripheral blood were measured by (A) multi-parameter flow cytometry and (B) RT-PCR (N = 7). Patient 3, who later developed ITP, demonstrated the highest relative percentage of CD3<sup>+</sup>CD8<sup>+</sup> T cells in the blood by multi-parameter flow cytometry at baseline, day 2, day 7 and week 3. RT-PCR measured expression of CD8 $\alpha$  in PBMCs at baseline, day 2, day 7, and week 3 and showed analogous changes.

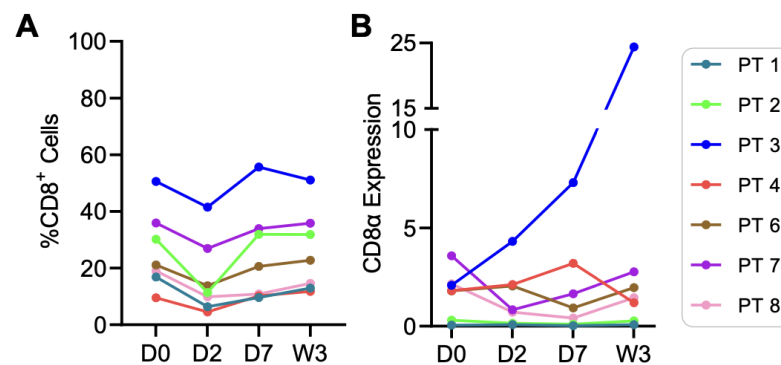

Supplement: jitc-2023-007381supp001.pdf [file jitc-2023-007381supp001.pdf]
